# Supplementary material for: Systems glycomics of adult zebrafish identifies organ-specific sialylation and glycosylation patterns
Source: PubMed Central journal article supplement (PMC6220181; doi:10.1038/s41467-018-06950-3), 2018-11-07
Supplement: 41467_2018_6950_MOESM4_ESM.pdf [file 41467_2018_6950_MOESM4_ESM.pdf]

Supplementary Data 1 (1/4) - Distribution of complex N-glycans

| No.  | exact mass                |        | Structures | Organs              |                     |                      |                      |                      |                          |                       |
|------|---------------------------|--------|------------|---------------------|---------------------|----------------------|----------------------|----------------------|--------------------------|-----------------------|
|      | theoretical<br><i>m/z</i> | Scheme |            | skin<br><i>[sk]</i> | gill<br><i>[gi]</i> | brain<br><i>[br]</i> | heart<br><i>[he]</i> | liver<br><i>[li]</i> | intestine<br><i>[in]</i> | testis<br><i>[te]</i> |
| NG1  | 1661,6                    |        |            |                     |                     | ✓                    |                      | ✓                    | ✓                        |                       |
| NG2  | 1824,9                    |        | ✓          |                     |                     |                      |                      |                      |                          |                       |
| NG3  |                           |        | ✓          |                     |                     |                      |                      |                      |                          |                       |
| NG4  | 1835,9                    |        |            |                     |                     |                      |                      | ✓                    | ✓                        |                       |
| NG5  | 1865,9                    |        |            |                     |                     |                      |                      | ✓                    |                          |                       |
| NG6  | 2029,0                    |        | ✓          | ✓                   |                     |                      |                      |                      |                          |                       |
| NG7  |                           |        | ✓          | ✓                   |                     |                      |                      |                      |                          |                       |
| NG8  | 2040,0                    |        |            | ✓                   | ✓                   |                      |                      |                      | ✓                        |                       |
| NG9  | 2070,0                    |        | ✓          |                     |                     |                      |                      | ✓                    | ✓                        |                       |
| NG10 |                           |        |            |                     |                     |                      |                      | ✓                    |                          |                       |
| NG11 |                           |        | ✓          |                     |                     |                      |                      |                      | ✓                        |                       |
| NG12 | 2081,1                    |        | ✓          | ✓                   | ✓                   | ✓                    | ✓                    | ✓                    | ✓                        |                       |
| NG13 | 2244,1                    |        | ✓          | ✓                   | ✓                   |                      |                      | ✓                    | ✓                        |                       |
| NG14 |                           |        | ✓          | ✓                   |                     |                      |                      | ✓                    | ✓                        |                       |
| NG15 | 2257,1                    |        |            |                     |                     |                      |                      |                      |                          | ✓                     |
| NG16 | 2285,2                    |        | ✓          | ✓                   |                     | ✓                    | ✓                    | ✓                    | ✓                        |                       |
| NG17 |                           |        | ✓          |                     |                     |                      |                      |                      | ✓                        |                       |
| NG18 |                           |        |            |                     | ✓                   |                      |                      | ✓                    |                          |                       |
| NG19 |                           |        |            |                     |                     |                      |                      |                      |                          | ✓                     |
| NG20 | 2431,2                    |        |            | ✓                   |                     |                      |                      |                      |                          |                       |
| NG21 | 2448,2                    |        |            | ✓                   |                     |                      |                      |                      |                          |                       |
| NG22 |                           |        |            | ✓                   |                     |                      |                      |                      |                          |                       |
| NG23 | 2459,2                    |        |            | ✓                   | ✓                   |                      |                      |                      |                          |                       |
| NG24 | 2461,2                    |        |            |                     |                     |                      |                      |                      |                          | ✓                     |
| NG25 | 2489,3                    |        |            | ✓                   |                     | ✓                    | ✓                    | ✓                    |                          |                       |
| NG26 |                           |        | ✓          | ✓                   |                     | ✓                    |                      | ✓                    |                          |                       |

Supplementary Data 1 (2/4)

| No.  | theoretical<br><i>m/z</i> | Scheme | <i>skin</i><br>[sk] | <i>gill</i><br>[gi] | <i>brain</i><br>[br] | <i>heart</i><br>[he] | <i>liver</i><br>[li] | <i>intestine</i><br>[in] | <i>testis</i><br>[te] | <i>ovary</i><br>[ov] |
|------|---------------------------|--------|---------------------|---------------------|----------------------|----------------------|----------------------|--------------------------|-----------------------|----------------------|
| NG27 | 2489,3                    |        |                     | ✓                   |                      | ✓                    |                      | ✓                        |                       |                      |
| NG28 |                           |        | ✓                   |                     |                      | ✓                    |                      |                          |                       |                      |
| NG29 |                           |        | ✓                   |                     |                      |                      |                      |                          |                       |                      |
| NG30 | 2605,3                    |        | ✓                   | ✓                   | ✓                    | ✓                    |                      | ✓                        |                       |                      |
| NG31 |                           |        |                     |                     | ✓                    |                      |                      |                          |                       |                      |
| NG32 |                           |        |                     | ✓                   | ✓                    | ✓                    |                      | ✓                        |                       |                      |
| NG33 |                           |        | ✓                   | ✓                   |                      | ✓                    |                      |                          |                       |                      |
| NG34 |                           |        |                     |                     |                      |                      |                      | ✓                        |                       |                      |
| NG35 | 2622,3                    |        |                     | ✓                   |                      |                      |                      |                          |                       |                      |
| NG36 |                           |        |                     | ✓                   |                      |                      |                      |                          |                       |                      |
| NG37 | 2635,3                    |        |                     | ✓                   |                      |                      |                      |                          |                       |                      |
| NG38 |                           |        |                     | ✓                   |                      |                      |                      |                          |                       |                      |
| NG39 |                           |        |                     | ✓                   |                      |                      |                      |                          |                       |                      |
| NG40 |                           |        |                     | ✓                   |                      |                      |                      |                          |                       |                      |
| NG41 |                           |        |                     | ✓                   |                      |                      |                      |                          |                       |                      |
| NG42 | 2663,3                    |        | ✓                   | ✓                   |                      | ✓                    | ✓                    | ✓                        | ✓                     | ✓                    |
| NG43 |                           |        | ✓                   |                     |                      |                      |                      |                          |                       |                      |
| NG44 | 2693,4                    |        |                     |                     |                      | ✓                    |                      |                          |                       |                      |
| NG45 |                           |        |                     |                     |                      | ✓                    |                      |                          |                       |                      |
| NG46 | 2809,4                    |        | ✓                   | ✓                   |                      | ✓                    |                      | ✓                        |                       |                      |
| NG47 |                           |        | ✓                   | ✓                   | ✓                    | ✓                    |                      | ✓                        |                       |                      |
| NG48 |                           |        |                     |                     | ✓                    |                      |                      |                          |                       |                      |
| NG49 |                           |        |                     |                     | ✓                    |                      |                      | ✓                        |                       |                      |
| NG50 |                           |        | ✓                   |                     |                      |                      |                      | ✓                        |                       |                      |
| NG51 |                           |        |                     |                     |                      |                      |                      | ✓                        |                       |                      |

Supplementary Data 1 (3/4)

| No.  | theoretical<br><i>m/z</i> | Scheme | skin<br>[sk] | gill<br>[gi] | brain<br>[br] | heart<br>[he] | liver<br>[li] | intestine<br>[in] | testis<br>[te] | ovary<br>[ov] |
|------|---------------------------|--------|--------------|--------------|---------------|---------------|---------------|-------------------|----------------|---------------|
| NG52 | 2826,4                    |        |              |              |               |               |               |                   | ✓              |               |
| NG53 | 2850,4                    |        | ✓            | ✓            |               |               |               |                   |                |               |
| NG54 |                           |        |              | ✓            |               |               |               |                   |                |               |
| NG55 |                           |        | ✓            | ✓            |               |               |               |                   |                |               |
| NG56 |                           |        | ✓            |              |               |               |               |                   |                |               |
| NG57 | 2867,4                    |        | ✓            | ✓            |               | ✓             |               | ✓                 | ✓              |               |
| NG58 | 2904,4                    |        |              |              |               |               |               |                   |                | ✓             |
| NG59 | 2934,5                    |        |              |              |               |               |               |                   |                | ✓             |
| NG60 | 2966,5                    |        |              |              | ✓             |               |               |                   |                |               |
| NG61 | 2983,5                    |        |              |              |               |               |               | ✓                 |                |               |
| NG62 |                           |        |              | ✓            |               |               |               | ✓                 |                |               |
| NG63 |                           |        |              | ✓            |               |               |               |                   |                |               |
| NG64 |                           |        |              |              |               |               |               | ✓                 |                |               |
| NG65 | 2996,5                    |        |              |              | ✓             |               |               |                   |                |               |
| NG66 | 3000,5                    |        |              |              |               |               |               |                   | ✓              |               |
| NG67 | 3013,5                    |        |              |              |               |               |               | ✓                 |                |               |
| NG68 |                           |        |              |              |               |               |               | ✓                 |                |               |
| NG69 | 3054,3                    |        |              | ✓            |               |               |               |                   | ✓              |               |
| NG70 |                           |        |              | ✓            |               |               |               |                   | ✓              |               |
| NG71 | 3071,5                    |        |              |              |               |               |               | ✓                 | ✓              |               |
| NG72 |                           |        |              |              |               | ✓             |               | ✓                 | ✓              |               |
| NG73 |                           |        |              |              |               |               |               | ✓                 |                |               |
| NG74 | 3129,5                    |        |              |              |               |               | ✓             |                   |                |               |
| NG75 | 3170,6                    |        |              | ✓            |               |               |               |                   |                |               |
| NG76 |                           |        |              |              | ✓             |               |               |                   |                |               |
| NG77 | 3187,6                    |        | ✓            | ✓            |               | ✓             | ✓             | ✓                 | ✓              | ✓             |
| NG78 | 3187,6                    |        |              |              |               |               |               | ✓                 |                |               |

### Supplementary Data 1 (4/4)

| No.  | theoretical<br><i>m/z</i> | Scheme | skin<br>[sk] | gill<br>[gi] | brain<br>[br] | heart<br>[he] | liver<br>[li] | intestine<br>[in] | testis<br>[te] | ovary<br>[ov] |
|------|---------------------------|--------|--------------|--------------|---------------|---------------|---------------|-------------------|----------------|---------------|
| NG79 | 3200,6                    |        |              |              | ✓             |               |               |                   |                |               |
| NG80 | 3200,6                    |        |              |              | ✓             |               |               |                   |                |               |
| NG81 | 3217,6                    |        |              | ✓            |               |               |               |                   |                | ✓             |
| NG82 | 3228,6                    |        |              | ✓            |               | ✓             |               | ✓                 | ✓              |               |
| NG83 |                           |        |              | ✓            |               |               |               | ✓                 |                |               |
| NG84 |                           |        |              |              |               |               |               | ✓                 |                |               |
| NG85 | 3245,6                    |        | ✓            | ✓            |               | ✓             | ✓             | ✓                 | ✓              | ✓             |
| NG86 | 3361,7                    |        |              |              |               | ✓             |               |                   |                |               |
| NG87 | 3374,7                    |        |              |              | ✓             |               |               |                   |                |               |
| NG88 |                           |        |              |              |               | ✓             |               |                   |                |               |
| NG89 | 3548,8                    |        | ✓            | ✓            | ✓             | ✓             | ✓             | ✓                 | ✓              | ✓             |
| NG90 | 3578,8                    |        | ✓            | ✓            | ✓             | ✓             | ✓             | ✓                 | ✓              | ✓             |
| NG91 | 3608,8                    |        | ✓            | ✓            | ✓             | ✓             | ✓             | ✓                 | ✓              | ✓             |
| NG92 | 3722,8                    |        | ✓            |              |               |               |               |                   |                |               |
| NG93 | 4359,2                    |        |              | ✓            |               |               |               |                   |                |               |
| NG94 | 4737,3                    |        |              | ✓            |               |               |               |                   |                |               |
| NG95 | 4739,3                    |        |              |              |               |               |               | ✓                 |                |               |

**Supplementary Data 1** - The inclusion criteria of individual molecules in an organ were (1) observation of corresponding MS signal in three independent experiments and (2) confirmation of individual compounds by MS/MS analysis of permethylated glycans. The structural analysis of N-glycans was mostly based on the CID MS/MS fragmentation patterns of permethylated N-glycans in positive mode, in accordance with knowledge of embryonic N-glycans<sup>1-5</sup>. Graphical representation is based on accepted conventions for N-glycans and monosaccharide nomenclature as follows: yellow circle, Gal; yellow square, GalNAc; blue circle, Glc; blue square, GlcNAc; green circle, Man; red triangle, Fuc; purple diamond, Neu5Ac; light blue diamond, Neu5Gc; green diamond, Kdn.<sup>6,7</sup> Core Fucose is *de facto* positioned on reducing GlcNAc residue

on C6 carbon as for all vertebrate *N*-glycans. The interglycosidic bonds between monosaccharides of antennae are represented using the conventional positions as in |, C2 position; /, C3 position; —, C4 position; \, C6 position. The respective positions of C3 and C6 branches on internal Man residue of *N*-glycan core are just indicative.

### Supplementary References

1. Guérardel, Y., Chang, L.-Y., Maes, E., Huang, C.-J. & Khoo, K.-H. Glycomic survey mapping of zebrafish identifies unique sialylation pattern. *Glycobiology* **16**, 244–257 (2006).
2. Chang, L.-Y. *et al.* Developmental regulation of oligosialylation in zebrafish. *Glycoconj. J.* **26**, 247–261 (2009).
3. Vanbeselaere, J. *et al.* Mapping the expressed glycome and glycosyltransferases of zebrafish liver cells as a relevant model system for glycosylation studies. *J. Proteome Res.* **11**, 2164–2177 (2012).
4. Hanzawa, K., Suzuki, N. & Natsuka, S. Structures and developmental alterations of *N*-glycans of zebrafish embryos. *Glycobiology* **27**, 228–245 (2017).
5. Takemoto, T., Natsuka, S., Nakakita, S.-I. & Hase, S. Expression of complex-type *N*-glycans in developmental periods of zebrafish embryo. *Glycoconj. J.* **22**, 21–26 (2005).
6. *Essentials of Glycobiology*. (Cold Spring Harbor Laboratory Press, 2015).
7. Varki, A. *et al.* Symbol Nomenclature for Graphical Representations of Glycans. *Glycobiology* **25**, 1323–1324 (2015).
