# Supplementary material for: Systems glycomics of adult zebrafish identifies organ-specific sialylation and glycosylation patterns
Source: PubMed Central journal article supplement (PMC6220181; doi:10.1038/s41467-018-06950-3), 2018-11-07
Supplement: 41467_2018_6950_MOESM5_ESM.pdf [file 41467_2018_6950_MOESM5_ESM.pdf]

**Supplementary Data 2 (1/2) - Distribution of mucin type O-glycans**

| No   | theoretical m/z | Scheme                                                                              | skin [sk] | gill [gi] | brain [br] | heart [he] | liver [li] | intestine [in] | testis [te] | ovary [ov] |
|------|-----------------|-------------------------------------------------------------------------------------|-----------|-----------|------------|------------|------------|----------------|-------------|------------|
| OG1  | 854,4           |    |           |           |            |            |            | ✓              |             |            |
| OG2  | 895,4           |    | ✓         | ✓         | ✓          | ✓          | ✓          | ✓              | ✓           |            |
| OG3  |                 |    |           |           |            | ✓          | ✓          | ✓              |             |            |
| OG4  | 925,4           |    |           | ✓         |            | ✓          |            |                |             |            |
| OG5  |                 |    |           |           |            | ✓          |            |                |             |            |
| OG6  | 936,4           |    |           | ✓         |            |            |            |                |             |            |
| OG7  | 953,5           |    | ✓         | ✓         |            |            |            | ✓              |             | ✓          |
| OG8  | 983,0           |   |           |           |            | ✓          |            | ✓              | ✓           |            |
| OG9  | 1141,0          |  |           |           |            |            |            |                | ✓           |            |
| OG10 | 1174,5          |  |           |           |            |            |            | ✓              |             |            |
| OG11 |                 |  |           |           |            |            |            | ✓              |             |            |
| OG12 | 1215,6          |  |           |           |            |            |            | ✓              |             |            |
| OG13 |                 |  |           |           |            |            |            | ✓              |             |            |
| OG14 | 1239,6          |  |           |           |            |            |            |                |             | ✓          |
| OG15 | 1256,6          |  | ✓         | ✓         | ✓          | ✓          | ✓          | ✓              | ✓           |            |
| OG16 | 1286,6          |  |           | ✓         | ✓          | ✓          |            | ✓              |             |            |
| OG17 |                 |  | ✓         | ✓         | ✓          | ✓          |            | ✓              |             |            |
| OG18 | 1314,6          |  | ✓         |           | ✓          |            |            | ✓              | ✓           | ✓          |
| OG19 | 1316,6          |  | ✓         |           |            | ✓          |            |                |             |            |

## Supplementary Data 2 (2/2)

| No   | theoretical m/z | Scheme | skin [sk] | gill [gi] | brain [br] | heart [he] | liver [li] | intestine [in] | testis [te] | ovary [ov] |
|------|-----------------|--------|-----------|-----------|------------|------------|------------|----------------|-------------|------------|
| OG20 | 1344,8          |        | ✓         |           | ✓          | ✓          | ✓          | ✓              | ✓           | ✓          |
| OG21 |                 |        |           |           | ✓          | ✓          |            |                |             |            |
| OG22 |                 |        |           |           | ✓          | ✓          |            |                |             |            |
| OG23 | 1361,7          |        | ✓         |           |            | ✓          | ✓          | ✓              | ✓           | ✓          |
| OG24 |                 |        | ✓         |           |            | ✓          |            |                |             |            |
| OG25 | 1374,6          |        | ✓         |           |            | ✓          |            |                |             | ✓          |
| OG26 |                 |        |           |           |            | ✓          |            |                |             |            |
| OG27 | 1617,8          |        | ✓         | ✓         |            |            |            |                |             |            |
| OG28 |                 |        | ✓         |           | ✓          | ✓          |            | ✓              | ✓           |            |
| OG29 | 1647,8          |        |           |           | ✓          |            |            |                |             |            |
| OG30 | 1722,8          |        |           |           |            | ✓          |            | ✓              | ✓           |            |
| OG31 | 1752,8          |        |           |           |            | ✓          |            | ✓              | ✓           |            |
| OG32 | 1791,9          |        |           | ✓         |            |            |            |                |             |            |
| OG33 | 1979,0          |        |           |           | ✓          |            |            |                |             |            |

**Supplementary Data 2** - The inclusion criteria of individual molecules in an organ were (1) observation of corresponding MS signal in three independent experiments and (2) confirmation of individual compounds by MS/MS analysis of permethylated glycans. The structural analysis of O-glycans was mostly based on the CID MS/MS fragmentation patterns of permethylated O-glycans in positive mode, in accordance with knowledge of embryonic O-glycans<sup>1-3</sup>. Graphical representation is based on accepted conventions for O-glycans and monosaccharide nomenclature.<sup>4,5</sup> The interglycosidic bonds between monosaccharides are represented using the conventional positions as |, C2 position; /, C3 position; —, C4 position; \, C6 position, except for ( $\alpha$ 2,8) linkages between sialic acids which do not follow any convention.

### Supplementary References

1. Guérardel, Y., Chang, L.-Y., Maes, E., Huang, C.-J. & Khoo, K.-H. Glycomic survey mapping of zebrafish identifies unique sialylation pattern. *Glycobiology* **16**, 244–257 (2006).
2. Chang, L.-Y. *et al.* Developmental regulation of oligosialylation in zebrafish. *Glycoconj. J.* **26**, 247–261 (2009).
3. Vanbeselaere, J. *et al.* Mapping the expressed glycome and glycosyltransferases of zebrafish liver cells as a relevant model system for glycosylation studies. *J. Proteome Res.* **11**, 2164–2177 (2012).
4. *Essentials of Glycobiology*. (Cold Spring Harbor Laboratory Press, 2015).
5. Varki, A. *et al.* Symbol Nomenclature for Graphical Representations of Glycans. *Glycobiology* **25**, 1323–1324 (2015).
