# Supplementary material for: Systems glycomics of adult zebrafish identifies organ-specific sialylation and glycosylation patterns
Source: PubMed Central journal article supplement (PMC6220181; doi:10.1038/s41467-018-06950-3), 2018-11-07
Supplement: 41467_2018_6950_MOESM6_ESM.pdf [file 41467_2018_6950_MOESM6_ESM.pdf]

### Supplementary Data 3 (1/7) - Distribution of GSLs

| No.  | Structures | exact mass      | Ceramide |               | Organs    |           |            |            |            |                |             |            |
|------|------------|-----------------|----------|---------------|-----------|-----------|------------|------------|------------|----------------|-------------|------------|
|      | Scheme     | theoretical m/z | mass     | SB, FA        | skin [sk] | gill [gi] | brain [br] | heart [he] | liver [li] | intestine [in] | testis [te] | ovary [ov] |
| GL1  | ● Cer      | 806.6           | 548      | d18:1, C16:0  | ✓         | ✓         |            |            |            |                | ✓           | ✓          |
| GL2  |            | 808.6           | 550      | d18:0, C16:0  |           |           |            |            |            |                |             | ✓          |
| GL3  |            | 836.6           | 578      | t18:0, C16:1  | ✓         | ✓         |            |            |            |                |             |            |
| GL4  |            | 838.6           | 580      | t18:0, C16:0  | ✓         | ✓         |            |            |            |                |             |            |
| GL5  |            | 866.7           | 608      | t18:0, C18:0  |           |           |            |            |            |                |             | ✓          |
| GL6  |            | 890.7           | 632      | t18:0, C20:2  | ✓         |           |            |            |            |                |             |            |
| GL7  |            | 892.7           | 634      | t18:0, C20:1  | ✓         |           | ✓          |            |            |                |             |            |
| GL8  |            | 894.7           | 636      | t18:0, C20:0  | ✓         | ✓         |            |            |            |                |             |            |
| GL9  |            | 916.7           | 658      | d18:1, 24:1   | ✓         |           | ✓          | ✓          |            |                |             |            |
| GL10 |            | 918.7           | 660      | d18:1, 24:0   | ✓         |           | ✓          | ✓          |            |                |             |            |
| GL11 |            | 920.7           | 662      | t18:0, C22:1  | ✓         |           | ✓          | ✓          |            |                |             |            |
| GL12 |            | 922.7           | 664      | t18:0, C22:0  |           |           | ✓          | ✓          |            |                |             |            |
| GL13 |            | 934.7           | 676      | t18:0, C23:1  |           |           |            |            | ✓          |                |             |            |
| GL14 |            | 946.7           | 688      | d18:1, C26:0  |           |           | ✓          | ✓          |            |                |             |            |
| GL15 |            | 948.7           | 690      | t18:0, C24:1  | ✓         | ✓         | ✓          | ✓          | ✓          |                | ✓           |            |
| GL16 |            | 962.8           | 704      | t18:0, C25:1  |           |           |            | ✓          |            |                |             |            |
| GL17 |            | 964.8           | 706      | t18:0, C25:0  |           |           |            |            | ✓          |                |             |            |
| GL18 |            | 966.8           | 708      | t18:0, hC23:0 |           |           |            |            |            | ✓              |             |            |
| GL19 |            | 976.8           | 718      | t18:0, C26:1  |           |           |            | ✓          |            |                |             |            |
| GL20 |            | 978.8           | 720      | t18:0, C26:0  |           |           |            |            |            | ✓              |             |            |
| GL21 |            | 980.8           | 722      | t18:0, hC24:0 |           |           |            |            | ✓          | ✓              |             |            |
| GL22 |            | 1004.9          | 746      | t18:1, C28:0  |           |           |            |            |            |                |             | ✓          |
| GL23 |            | 1006.9          | 748      | t18:0, C28:0  |           |           |            |            |            |                |             | ✓          |
| GL24 |            | 1008.8          | 750      | t18:0, hC26:0 |           |           |            |            | ✓          | ✓              |             |            |
| GL25 | ◆ ● Cer    | 1281.9          | 662      | t18:0, C22:1  |           |           |            | ✓          | ✓          |                |             |            |
| GL26 |            | 1295.9          | 676      | t18:0, C23:1  |           |           |            | ✓          | ✓          |                |             |            |
| GL27 |            | 1299.9          | 680      | t18:0, hC20:0 |           |           |            |            |            | ✓              |             |            |
| GL28 |            | 1310.0          | 690      | t18:0, C24:1  |           |           |            | ✓          | ✓          |                |             |            |

## Supplementary Data 3 (2/7)

| No.  | Scheme                                                                                  | theoretical<br>m/z | mass | SB, FA        | skin<br>[sk] | gill<br>[gi] | brain<br>[br] | heart<br>[he] | liver<br>[li] | intestine<br>[in] | testis<br>[te] | ovary<br>[ov] |
|------|-----------------------------------------------------------------------------------------|--------------------|------|---------------|--------------|--------------|---------------|---------------|---------------|-------------------|----------------|---------------|
| GL29 |  Cer   | 1314,0             | 694  | t18:0, hC22:0 |              |              |               |               |               | ✓                 |                |               |
| GL30 |                                                                                         | 1324,0             | 704  | t18:0, C25:1  |              |              |               | ✓             | ✓             |                   |                |               |
| GL31 |                                                                                         | 1328,0             | 708  | t18:0, hC23:0 |              |              |               |               |               | ✓                 |                |               |
| GL32 |                                                                                         | 1338,0             | 718  | t18:0, C26:1  |              |              |               | ✓             | ✓             |                   |                |               |
| GL33 |                                                                                         | 1366,0             | 746  | t18:0, C28:1  |              |              |               |               | ✓             |                   |                |               |
| GL34 |  Cer   | 1312,0             | 662  | t18:0, C22:1  |              |              |               | ✓             | ✓             |                   |                |               |
| GL35 |                                                                                         | 1326,0             | 676  | t18:0, C23:1  |              |              |               | ✓             |               | ✓                 |                |               |
| GL36 |                                                                                         | 1329,0             | 680  | t18:0, hC20:0 |              |              |               |               |               | ✓                 |                |               |
| GL37 |                                                                                         | 1340,0             | 690  | t18:0, C24:1  |              |              |               | ✓             |               |                   |                |               |
| GL38 |                                                                                         | 1368,0             | 718  | t18:0, C28:1  |              |              |               |               | ✓             |                   |                |               |
| GL39 |                                                                                         | 1372,0             | 722  | t18:0, hC24:0 |              |              |               |               |               | ✓                 |                |               |
| GL40 |  Cer   | 1272,9             | 694  | t18:0, hC22:0 |              |              |               |               |               | ✓                 |                |               |
| GL41 |                                                                                         | 1286,9             | 708  | t18:0, hC23:0 |              |              |               |               |               | ✓                 |                |               |
| GL42 |                                                                                         | 1299,9             | 720  | t18:0, C26:0  |              |              |               |               |               | ✓                 |                |               |
| GL43 |                                                                                         | 1301,0             | 722  | t18:0, hC24:0 |              |              |               |               |               | ✓                 |                |               |
| GL44 |                                                                                         | 1313,0             | 734  | t18:0, C27:0  |              |              |               |               |               | ✓                 |                |               |
| GL45 |                                                                                         | 1315,0             | 736  | t18:0, hC25:0 |              |              |               |               |               | ✓                 |                |               |
| GL46 |                                                                                         | 1329,0             | 750  | t18:0, hC26:0 |              |              |               |               |               | ✓                 |                |               |
| GL47 |  Cer | 1008,7             | 546  | d18:1, C16:1  |              |              |               | ✓             |               | ✓                 |                |               |
| GL48 |                                                                                         | 1010,8             | 548  | d18:1, C16:0  |              | ✓            |               |               | ✓             | ✓                 |                | ✓             |
| GL49 |                                                                                         | 1012,8             | 550  | d18:0, C16:0  |              |              |               |               |               |                   |                | ✓             |
| GL50 |                                                                                         | 1092,8             | 630  | d18:1, C22:1  |              | ✓            |               |               |               |                   |                |               |
| GL51 |                                                                                         | 1094,8             | 632  | d18:1, C22:0  |              | ✓            |               |               |               |                   |                |               |
| GL52 |                                                                                         | 1120,9             | 658  | d18:1, C24:1  | ✓            | ✓            | ✓             | ✓             |               | ✓                 |                |               |
| GL53 |                                                                                         | 1122,9             | 660  | d18:1, C24:0  |              | ✓            | ✓             | ✓             |               | ✓                 |                | ✓             |
| GL54 |                                                                                         | 1124,9             | 662  | t18:0, C22:1  |              |              |               |               |               | ✓                 |                |               |
| GL55 |  Cer | 1372,0             | 548  | d18:1, C16:0  | ✓            | ✓            |               | ✓             |               | ✓                 | ✓              |               |

Supplementary Data 3 (3/7)

| No.  | Scheme | theoretical<br>m/z | mass | SB, FA       | skin<br>[sk] | gill<br>[gi] | brain<br>[br] | heart<br>[he] | liver<br>[li] | intestine<br>[in] | testis<br>[te] | ovary<br>[ov] |
|------|--------|--------------------|------|--------------|--------------|--------------|---------------|---------------|---------------|-------------------|----------------|---------------|
| GL56 |        | 1456,0             | 632  | d18:1, C22:0 |              | ✓            |               |               |               | ✓                 | ✓              |               |
| GL57 |        | 1482,0             | 658  | d18:1, C24:1 | ✓            |              |               | ✓             |               |                   | ✓              |               |
| GL58 |        | 1484,0             | 660  | d18:1, C24:0 | ✓            |              |               |               |               |                   | ✓              |               |
| GL59 |        | 1544,1             | 720  | t18:0, C26:0 |              | ✓            |               |               |               |                   |                |               |
| GL60 |        | 1761,1             | 576  | d18:1, C18:0 |              |              | ✓             |               |               |                   |                |               |
| GL61 |        | 1821,2             | 636  | t18:0, C20:0 |              |              |               |               |               | ✓                 |                |               |
| GL62 |        | 1903,2             | 718  | t18:0, C26:1 |              |              |               |               |               |                   | ✓              |               |
| GL63 |        | 2123,3             | 576  | d18:1, C18:0 |              |              | ✓             |               |               |                   |                |               |
| GL64 |        | 2153,3             | 576  | d18:1, C18:0 |              |              | ✓             |               |               |                   |                |               |
| GL65 |        | 2153,3             | 576  | d18:1, C18:0 |              |              | ✓             |               |               |                   |                |               |
| GL66 |        | 2153,3             | 576  | d18:1, C18:0 |              |              | ✓             |               |               |                   |                |               |
| GL67 |        | 1617,1             | 548  | d18:1, C16:0 | ✓            | ✓            |               | ✓             | ✓             | ✓                 | ✓              | ✓             |
| GL68 |        | 1647,1             | 578  | t18:0, C16:1 | ✓            | ✓            |               |               |               |                   | ✓              | ✓             |
| GL69 |        | 1701,1             | 632  | d18:1, C22:0 | ✓            | ✓            |               | ✓             |               |                   | ✓              |               |
| GL70 |        | 1727,2             | 658  | d18:1, C24:1 |              | ✓            |               | ✓             | ✓             | ✓                 | ✓              | ✓             |
| GL71 |        | 1729,2             | 660  | d18:1, C24:0 | ✓            | ✓            |               |               |               | ✓                 | ✓              | ✓             |
| GL72 |        | 1757,2             | 688  | d18:1, C26:0 | ✓            |              |               |               |               |                   | ✓              | ✓             |
| GL73 |        | 1759,2             | 690  | t18:0, C24:1 |              |              |               |               |               |                   | ✓              | ✓             |
| GL74 |        | 1647,1             | 548  | d18:1, C16:0 |              |              |               | ✓             |               | ✓                 | ✓              | ✓             |
| GL75 |        | 1757,2             | 658  | d18:1, C24:1 | ✓            |              |               | ✓             |               | ✓                 | ✓              |               |
| GL76 |        | 1759,2             | 660  | d18:1, C24:0 | ✓            |              |               | ✓             |               | ✓                 | ✓              |               |
| GL77 |        | 1460,0             | 548  | d18:1, C16:0 |              | ✓            |               |               |               |                   | ✓              |               |
| GL78 |        | 1520,0             | 608  | t18:0, C18:0 |              |              |               |               |               |                   | ✓              |               |
| GL79 |        | 1544,1             | 632  | d18:1, C22:0 |              | ✓            |               |               |               |                   |                |               |
| GL80 |        | 1604,1             | 692  | t18:0, C24:0 |              | ✓            |               |               |               |                   |                |               |
| GL81 |        | 1819,1             | 546  | d18:1, C16:1 |              |              |               |               |               |                   |                | ✓             |
| GL82 |        | 1821,2             | 548  | d18:1, C16:0 | ✓            | ✓            |               |               | ✓             | ✓                 | ✓              | ✓             |

Supplementary Data 3 (4/7)

| No.   | Scheme                                                                              | theoretical<br>m/z | mass | SB, FA       | skin<br>[sk] | gill<br>[gi] | brain<br>[br] | heart<br>[he] | liver<br>[li] | intestine<br>[in] | testis<br>[te] | ovary<br>[ov] |
|-------|-------------------------------------------------------------------------------------|--------------------|------|--------------|--------------|--------------|---------------|---------------|---------------|-------------------|----------------|---------------|
| GL83  |    | 1850,2             | 576  | d18:1, C18:0 |              |              | ✓             |               |               |                   |                |               |
| GL84  |                                                                                     | 1933,3             | 660  | d18:1, C24:0 | ✓            | ✓            |               | ✓             |               | ✓                 |                |               |
| GL85  |    | 1851,2             | 548  | d18:1, C16:0 |              |              |               |               | ✓             |                   |                |               |
| GL86  |    | 1821,2             | 548  | d18:1, C16:0 | ✓            | ✓            |               |               |               |                   | ✓              |               |
| GL87  |                                                                                     | 1850,2             | 576  | d18:1, C18:0 |              |              | ✓             |               |               |                   |                |               |
| GL88  |                                                                                     | 1933,3             | 660  | d18:1, C24:0 |              | ✓            |               |               |               |                   |                |               |
| GL89  |    | 2210,3             | 576  | d18:1, C18:0 |              |              | ✓             |               |               |                   |                |               |
| GL90  |                                                                                     | 2270,4             | 636  | t18:0, C20:0 | ✓            |              |               |               |               |                   |                |               |
| GL91  |                                                                                     | 2294,5             | 660  | d18:1, C24:0 | ✓            |              |               |               |               |                   |                |               |
| GL92  |                                                                                     | 2296,4             | 662  | t18:0, C22:1 | ✓            |              |               |               |               |                   |                |               |
| GL93  |                                                                                     | 2322,5             | 688  | d18:1, C26:0 | ✓            |              |               |               |               |                   |                |               |
| GL94  |                                                                                     | 2324,5             | 690  | t18:0, C24:1 | ✓            |              |               |               |               |                   |                |               |
| GL95  |  | 2210,3             | 576  | d18:1, C18:0 |              |              | ✓             |               |               |                   |                |               |
| GL96  |  | 2572,5             | 576  | d18:1, C18:0 |              |              | ✓             |               |               |                   |                |               |
| GL97  |  | 2572,5             | 576  | d18:1, C18:0 |              |              | ✓             |               |               |                   |                |               |
| GL98  |  | 2602,2             | 576  | d18:1, C18:0 |              |              | ✓             |               |               |                   |                |               |
| GL99  |  | 2602,2             | 576  | d18:1, C18:0 |              |              | ✓             |               |               |                   |                |               |
| GL100 |  | 2602,2             | 576  | d18:1, C18:0 |              |              | ✓             |               |               |                   |                |               |
| GL101 |  | 2602,2             | 576  | d18:1, C18:0 |              |              | ✓             |               |               |                   |                |               |
| GL102 |  | 2933,7             | 576  | d18:1, C18:0 |              |              | ✓             |               |               |                   |                |               |
| GL103 |  | 2963,7             | 576  | d18:1, C18:0 |              |              | ✓             |               |               |                   |                |               |
| GL104 |  | 2963,7             | 576  | d18:1, C18:0 |              |              | ✓             |               |               |                   |                |               |
| GL105 |  | 3294,8             | 576  | d18:1, C18:0 |              |              | ✓             |               |               |                   |                |               |
| GL106 |  | 3294,8             | 576  | d18:1, C18:0 |              |              | ✓             |               |               |                   |                |               |
| GL107 |  | 1879,2             | 548  | d18:1, C16:0 |              |              |               |               |               |                   | ✓              |               |
| GL108 |  | 1879,2             | 548  | d18:1, C16:0 |              |              |               |               |               |                   | ✓              |               |
| GL109 |  | 2066,3             | 548  | d18:1, C16:0 |              | ✓            |               |               |               |                   | ✓              | ✓             |

Supplementary Data 3 (5/7)

| No.   | Scheme                                                                              | theoretical m/z | mass | SB, FA        | skin [sk] | gill [gi] | brain [br] | heart [he] | liver [li] | intestine [in] | testis [te] | ovary [ov] |
|-------|-------------------------------------------------------------------------------------|-----------------|------|---------------|-----------|-----------|------------|------------|------------|----------------|-------------|------------|
| GL110 | 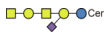   | 2096,3          | 578  | t18:0, C16:1  |           |           |            |            |            |                | ✓           |            |
| GL111 |    | 2066,3          | 548  | d18:1, C16:0  | ✓         | ✓         |            | ✓          |            |                | ✓           | ✓          |
| GL112 |                                                                                     | 2096,3          | 578  | t18:0, C16:1  |           |           |            |            |            |                | ✓           |            |
| GL113 |    | 2238,4          | 546  | d18:1, C16:1  |           |           |            |            |            | ✓              |             |            |
| GL114 |                                                                                     | 2240,4          | 548  | d18:1, C16:0  | ✓         | ✓         |            |            | ✓          | ✓              | ✓           |            |
| GL115 |                                                                                     | 2270,4          | 578  | t18:0, C16:1  | ✓         |           |            |            |            |                |             |            |
| GL116 |                                                                                     | 2272,4          | 580  | t18:0, C16:0  |           |           |            |            | ✓          |                |             |            |
| GL117 |                                                                                     | 2350,5          | 658  | d18:1, C24:1  | ✓         |           |            | ✓          |            |                |             |            |
| GL118 |                                                                                     | 2352,5          | 660  | d18:1, C24:0  | ✓         |           |            | ✓          | ✓          |                | ✓           |            |
| GL119 |                                                                                     | 2382,5          | 690  | t18:0, C24:1  |           |           |            |            |            |                | ✓           |            |
| GL120 |    | 2270,4          | 548  | d18:1, C16:0  |           |           |            |            | ✓          |                | ✓           |            |
| GL121 |                                                                                     | 2382,5          | 660  | d18:1, C24:0  |           |           |            |            |            |                | ✓           |            |
| GL122 |  | 2270,4          | 548  | d18:1, C16:0  |           |           |            |            |            |                | ✓           |            |
| GL123 |  | 1501,0          | 548  | d18:1, C16:0  |           |           |            |            |            |                | ✓           | ✓          |
| GL124 |  | 1705,1          | 548  | d18:1, C16:0  |           |           |            |            |            |                | ✓           |            |
| GL125 |                                                                                     | 1817,2          | 660  | d18:1, C24:0  |           |           |            |            |            |                |             | ✓          |
| GL126 |                                                                                     | 1819,2          | 662  | t18:0, C22:1  |           |           |            |            |            |                |             | ✓          |
| GL127 |                                                                                     | 1821,2          | 664  | t18:0, C22:0  |           |           |            |            |            |                |             | ✓          |
| GL128 |  | 2066,3          | 548  | d18:1, C16:0  |           | ✓         |            |            |            |                | ✓           | ✓          |
| GL129 |                                                                                     | 2096,3          | 578  | t18:0, C16:1  |           |           |            |            |            |                | ✓           |            |
| GL130 |  | 2124,3          | 548  | d18:1, C16:0  |           |           |            |            |            |                | ✓           |            |
| GL131 |                                                                                     | 2156,3          | 580  | t18:0, C16:0  |           | ✓         |            |            |            |                |             |            |
| GL132 |                                                                                     | 2180,3          | 604  | d18:1, C18:0  | ✓         |           |            |            |            |                |             |            |
| GL133 |                                                                                     | 2186,3          | 610  | t18:0, hC16:0 | ✓         |           |            |            |            |                |             |            |
| GL134 |                                                                                     | 2212,4          | 636  | t18:0, C20:0  |           | ✓         |            |            |            |                |             |            |
| GL135 |                                                                                     | 2226,3          | 650  | t18:0, C21:0  |           | ✓         |            |            |            |                |             |            |
| GL136 |                                                                                     | 2240,3          | 664  | t18:0, C22:0  | ✓         | ✓         |            |            |            |                |             |            |



### Supplementary Data 3 (7/7)

| No.   | Scheme | theoretical<br>m/z | mass   | SB, FA       | skin<br>[sk] | gill<br>[gi] | brain<br>[br] | heart<br>[he] | liver<br>[li] | intestine<br>[in] | testis<br>[te] | ovary<br>[ov] |
|-------|--------|--------------------|--------|--------------|--------------|--------------|---------------|---------------|---------------|-------------------|----------------|---------------|
| GL163 |        | 2732,8             | 748    | t18:0, C28:0 |              |              |               |               |               |                   | ✓              |               |
| GL164 |        | 2738,6             | 580    | t18:0, C16:0 |              |              |               |               |               |                   |                | ✓             |
| GL165 |        | 2808,7             | 650    | t18:0, C21:0 |              |              |               |               |               |                   |                |               |
| GL166 |        | 2848,7             | 690    | t18:0, C24:1 |              |              |               |               |               |                   |                | ✓             |
| GL167 |        | 2878,8             | 720    | t18:0, C26:0 |              |              |               |               |               |                   |                | ✓             |
| GL168 |        | 2904,8             | 746    | t18:0, C28:1 |              |              |               |               |               |                   |                | ✓             |
| GL169 |        |                    | 2983,8 | 580          | t18:0, C16:0 |              |               |               |               |                   |                |               |
| GL170 | 3095,9 |                    | 692    | t18:0, C24:0 |              |              |               |               |               |                   |                | ✓             |
| GL171 |        | 3545,1             | 692    | t18:0, C24:0 |              |              |               |               |               |                   |                | ✓             |
| GL172 |        | 2747,7             | 548    | d18:1, C16:0 |              |              |               |               |               |                   | ✓              |               |

**Supplementary Data 3** - The inclusion criteria of individual molecules in an organ were (1) observation of corresponding MS signal in three independent experiments and (2) confirmation of individual compounds by MS/MS analysis of permethylated glycans. The sequence of carbohydrate moieties and the nature of ceramides were established by CID MS/MS fragmentation of permethylated GSLs in positive mode. Values in “mass” column correspond to the diagnostic Z fragmentation ions for the methylated ceramide moiety. Most probable combinations of sphingoid bases and fatty acids based on composition and Z fragment ions are provided in the “SB, FA” column. Graphical representation is based on accepted conventions for GSLs and monosaccharide nomenclature.<sup>1,2</sup> The interglycosidic bonds between monosaccharides are represented using the conventional positions as |, C2 position; /, C3 position; —, C4 position; \, C6 position, except for ( $\alpha$ 2,8) linkages between sialic acids which do not follow any convention. Whenever linkages could not be deduced from specific CID MS/MS fragmentation pattern and literature, they are shown as dotted lines.

#### Supplementary References

1. *Essentials of Glycobiology*. (Cold Spring Harbor Laboratory Press, 2015).
2. Varki, A. *et al.* Symbol Nomenclature for Graphical Representations of Glycans. *Glycobiology* **25**, 1323–1324 (2015).
